# Supplementary material for: Transition metals and oxidation reactions trigger stargate opening during the initial stages of the replicative cycle of the giant Tupanvirus
Source: PubMed Central journal article supplement (PMC11481487; doi:10.1128/mbio.02192-24), 2024-09-26
Supplement: mbio.02192-24-s0001.pdf [file mbio.02192-24-s0001.pdf]

## Supplemental Figure Legends

**Supplemental Figure S1.** Distribution of metal-binding associations from 141 proteins identified by MS above the cutoff value of 0.4 plotted as a percentage of total hits, either by functional category (A) or by metal ion (B).

**Supplemental Figure S2.** Distribution of metal-binding associations from 141 proteins identified by MS above the cutoff value of 0.4, plotted as a percentage of total hits to metal ions within assigned functional categories (A) or to functional categories pertaining to specific metal ions (B).

**Supplemental Figure S3.** *TEM images of transition metals-treated TPV particles.* Panels show different metals used to treat TPV particles. Scale bar corresponds to 2  $\mu\text{m}$ .
